# Supplementary material
Source: PubMed Central journal article supplement (PMC3663509)
Supplement: supp_M113.466532_jbc.M113.466532-1.pdf [file supp_M113.466532_jbc.M113.466532-1.pdf]

**Supplemental Information:** Tables S1 and S2 and Figures S1 and S2

Cheng J, Goldstein R, Gershenson A, Stec B, Roberts MF (2013)

“The cation-  $\pi$  box is a specific phosphatidylcholine membrane targeting motif,”

The following table compares all proteins in the PDB as of August 2012 that contain choline, phosphocholine, phosphatidylcholine lipid, or similar choline containing ligands. Included in the chart is the identity of the protein, its organism of origin, all PDBs associated with its identity and origin, as well as its state of membrane interaction and the function of the protein. Ligands are abbreviated as per PDB codes, and a list of the abbreviations follows. The binding mode of the choline ligand is also noted, with attention focused on the nature of the coordination of the quaternary amine of the choline or choline portion of the ligand. Proteins are ordered in a general sense by function, i.e. proteins that bind choline specifically, lipid transfer proteins, esterases, etc. Highlighted in bold are any proteins that bind the quaternary amine of choline with a  $\pi$ -cation box type arrangement: that is, the cationic quaternary amine is held between the  $\pi$  systems several (usually 2-4) aromatic residues.

**Table SI.** Proteins in the PDB that have been shown to bind choline or choline-containing ligands.

| <b>Protein<br/>(organism)</b>                                         | <b>PDBID</b>                       | <b>Membrane<br/>Interaction</b> | <b>Function</b>                | <b>Ligand</b> | <b>Binding Mode</b>                                                                           |
|-----------------------------------------------------------------------|------------------------------------|---------------------------------|--------------------------------|---------------|-----------------------------------------------------------------------------------------------|
| <b>choline binding protein F</b> ( <i>Streptococcus pneumoniae</i> )  | 2V04, 2V05, 2VYU, 2X8M, 2X8O, 2X8P | soluble                         | choline binding protein        | CHO           | quaternary amine held by $\pi$ -cation box                                                    |
| <b>choline binding domain from autolysin</b> ( <i>S. pneumoniae</i> ) | 1GVM, 1H8G, 1HCX                   | soluble                         | choline binding protein        | CHO           | quaternary amine held by $\pi$ -cation box                                                    |
| <b>choline binding domain of Spr1274</b> ( <i>S. pneumoniae</i> )     | 3HIA                               | soluble                         | choline binding protein        | CHO           | quaternary amine held in $\pi$ -cation box; hydroxyl held by a phosphate via an Asn and a Ser |
| <b>choline binding protein</b> ( <i>Sinorhizobium meliloti</i> )      | 2REG                               | membrane bound                  | ABC transporter                | CHO           | quaternary amine held by $\pi$ -cation box, Asp and Asn form polar contacts                   |
| <b>choline acetyl-transferase</b> (human)                             | 2FY3                               | soluble                         | generates acetylcholine        | CHO           | quaternary amine held by $\pi$ -cation box                                                    |
| <b>OpuBC</b> ( <i>Bacillus subtilis</i> )                             | 3R6U, 3PPQ                         | soluble                         | choline binding protein        | CHO           | quaternary amine held by $\pi$ -cation box                                                    |
| <b>acetylcholine binding protein</b> ( <i>Lymnaea stagnalis</i> )     | 1UV6, 2XZ5                         | membrane bound                  | acetylcholine binding protein  | CCE           | quaternary amine held by $\pi$ -cation box                                                    |
| C-reactive protein (human)                                            | 1b09                               | soluble                         | phosphocholine binding protein | PC            | bound via the phosphate                                                                       |
| <b>PDV-109 fibronectin module</b> (bovine)                            | 1H8P                               | interfacial                     | choline lipid binding protein  | PC            | quaternary amine is held by a $\pi$ -cation box                                               |
| <b>IGA-Kappa MC/PC603 FAB</b> (mouse)                                 | 2MCP                               | soluble                         | phosphocholine binding protein | PC            | quaternary amine is held by a $\pi$ -cation box; phosphate is coordinated by an Arg           |

| Protein                                                           | PDBID                        | Membrane Interactions | Function                       | Ligand             | Binding Mode                                                                                              |
|-------------------------------------------------------------------|------------------------------|-----------------------|--------------------------------|--------------------|-----------------------------------------------------------------------------------------------------------|
| <b>immune response protein</b> (human)                            | 1DL7                         | soluble               | phosphocholine binding protein | NCH                | quaternary amine is held by a $\pi$ -cation box; polar contacts to phosphate                              |
| <b>phosphatidylcholine transfer protein</b> (human)               | 1LN1, 1LN2, 1LN3             | interfacial           | PC lipid transfer protein      | DLP                | quaternary amine is held by a $\pi$ -cation box; also held by acyl chains, ligand is very tightly bound   |
| phosphatidylinositol transfer protein (human, rat)                | 1UW5, 2A1L, 1T27             | interfacial           | PI/PC transfer protein         | PC, PCW            | acyl chains and phosphate bound; choline group is apparently uncoordinated                                |
| <b>Sec14 homolog</b> (yeast)                                      | 3B7Q, 3B7Z                   | soluble               | PI/PC transfer protein         | 6PL                | quaternary amine held by $\pi$ -cation box; lipid chains also bound                                       |
| <b>autolysin</b> ( <i>S. pneumoniae</i> )                         | 2WW5, 2WWC, 2WWD             | soluble               | peptidoglycanase               | CHO                | quaternary amine held by $\pi$ -cation box                                                                |
| <b>Endolysin</b> (phage CP-1)                                     | 1OBA                         | soluble               | peptidoglycanase               | CHO                | quaternary amine held by $\pi$ -cation box                                                                |
| <b>butyryl cholinesterase</b> (human)                             | 1P0M                         | soluble               | esterase                       | CHO                | quaternary amine held by $\pi$ -cation box                                                                |
| phosphocholine esterase domain from CPBE ( <i>S. pneumoniae</i> ) | 1WRA, 2BIB                   | interfacial           | esterase                       | PC                 | mostly bound through phosphate; single $\pi$ -cation interaction with quaternary amine                    |
| <b>Acetylcholinesterase</b> (mouse)                               | 2HA2, 2HA3, 2HA6, 2HA5, 2HA7 | soluble               | esterase                       | SCU, CHO, SCK, BCH | quaternary amine held by $\pi$ -cation box, additional polar contacts bind molecule                       |
| <b>butyrylcholine esterase</b> (human)                            | 1P0P                         | soluble               | esterase                       | BCH                | quaternary amine held by $\pi$ -cation box, as well as various polar contacts on the rest of the molecule |
| <b>Acetylcholinesterase</b> ( <i>Torpedo californica</i> )        | 2C58, 2C4H                   | soluble               | esterase                       | BCH                | quaternary amine held by $\pi$ -cation box                                                                |
| <b>choline kinase</b> ( <i>Plasmodium knowlesi</i> )              | 3C5I                         | soluble               | kinase                         | CHO                | quaternary amine held in $\pi$ -cation box, hydroxide coordinated by an Asp and Glu                       |
| <b>choline kinase <math>\alpha</math>2</b> (human)                | 2CKQ                         | soluble               | kinase                         | PC                 | quaternary amine held in $\pi$ -cation box; phosphate coordinated by Ser, Asp, Asn                        |
| potassium channel ( <i>Burkholderia pseudomallei</i> )            | 2WLL                         | membrane bound        | ion channel                    | PLC                | bound via the phosphate only                                                                              |
| potassium channel ( <i>Magnetospirillum magnetotacticum</i> )     | 2x6a, 2x6b, 2x6c             | membrane bound        | ion channel                    | PC                 | binding to phosphate dominant; a single $\pi$ -cation interaction                                         |

| Protein                                                                               | PDBID                              | Membrane Interactions | Function                         | Ligand   | Binding Mode                                                                                       |
|---------------------------------------------------------------------------------------|------------------------------------|-----------------------|----------------------------------|----------|----------------------------------------------------------------------------------------------------|
| <b>Na<sup>+</sup> coupled betaine symporter</b> ( <i>Corynebacterium glutamicum</i> ) | 3P03                               | membrane bound        | transporter                      | CHO      | quaternary amine held by $\pi$ -cation box, additional polar contacts bind molecule                |
| LeuT ( <i>Aquifex aeolicus</i> )                                                      | 3USG, 3USL, 3USM,                  | membrane bound        | sodium symporter                 | PC       | bound by the lipid chains; no interaction with phosphocholine                                      |
| ligand gated ion channel ( <i>Aquifex aeolicus</i> )                                  | 3p4w, 3p50, 3uu5, 3uu8, 3uub, 3EAM | membrane bound        | ion channel                      | PLC, GPC | lipid chains are bound; polar contacts to the phosphate and glycerol; no interactions with choline |
| Xanthorhodopsin ( <i>Salinibacter ruber</i> )                                         | 3DDL                               | membrane bound        | ion channel                      | PX4      | bound by the lipid chains; phosphate is visible but not bound; choline head group is not ordered   |
| NavAB ( <i>Arcobacter butzleri</i> )                                                  | 3RVY, 3RVZ, 3RW0                   | membrane bound        | voltage gated ion channel        | PX4      | bound by the lipid chains; phosphate is visible but not bound; choline head group is not ordered   |
| SR calcium pump ( <i>Oryctolagus cuniculus</i> )                                      | 2ZBD, 3AR2                         | membrane bound        | ion pump                         | GPC      | bound by lipid chains and phosphate; choline is not bound                                          |
| sodium potassium pump (porcine)                                                       | 3B8E                               | membrane bound        | ion pump                         | GPC      | bound by phosphate only; lipid chains are not ordered                                              |
| voltage dependent ion anion channel (mouse)                                           | 3EMN                               | membrane bound        | ion channel                      | MC3      | bound by acyl chain and polar contact to glycerol; choline is not ordered                          |
| Lipase ( <i>Thermomyces lanuginose</i> )                                              | 1EIN                               | interfacial           | lipase                           | PLC      | bound by the lipid chains only; choline is not bound                                               |
| lipase-procolipase (human)                                                            | 1LPA                               | interfacial           | lipase                           | PLC      | bound by the lipid chains only; choline is not bound                                               |
| phospholipase A <sub>2</sub> (porcine)                                                | 1L8S                               | interfacial           | lipase                           | LPE      | bound by the lipid chains only; choline is not bound                                               |
| Phospholipase ( <i>Bacillus cereus</i> )                                              | 1P6D, 1P6E                         | interfacial           | phospholipase                    | 3PC, PC5 | extensive coordination to sulfur (PC5); Glu coordination to the choline                            |
| cytochrome BC1 (chicken)                                                              | 3H1I, 3H1J                         | membrane bound        | mitochondrial electron transport | PLC      | ligand is held by acyl chains, with 1 Asp near choline                                             |
| photosynthetic reaction center ( <i>Rhodobacter sphaeroides</i> R26)                  | 2HG9, 2HH1, 2HG3, 2J8C, 1M3X       | membrane bound        | photosynthetic reaction center   | PCK, GPC | held by lipid chains only                                                                          |
| mitochondrial ADP/ATP carrier (bovine)                                                | 1OKC                               | membrane bound        | ATP transport                    | GPC      | coordinated by phosphate only                                                                      |
| cytochrome BC1 complex (yeast)                                                        | 1KB9                               | membrane bound        | electron transport chain         | PCF      | held by lipid chain, phosphate makes polar contacts                                                |

| Protein                                                  | PDBID                                                                                                | Membrane Interactions | Function                         | Ligand | Binding Mode                                                                                                                                    |
|----------------------------------------------------------|------------------------------------------------------------------------------------------------------|-----------------------|----------------------------------|--------|-------------------------------------------------------------------------------------------------------------------------------------------------|
| cytochrome BC1 complex (yeast)                           | 1P84                                                                                                 | membrane bound        | electron transport chain         | GPC    | held by lipid chains only                                                                                                                       |
| cytochrome C oxidase (bovine)                            | 1V54, 2DYR, 3AG2, 3AG3, 1V55, 2EIJ, 3ABM, 2ABK, 3AG4, 2EIK, 2EIL, 3ABL, 2DYS, 3AG1, 2ZXW, 2EIM, 2EIN | membrane bound        | electron transport chain         | PSC    | held by choline head group with 1 Tyr, and 1 Asp, extensive polar contacts with phosphate, complete hydrophobic interaction with the acyl chain |
| cytochrome BC1 complex (yeast)                           | 1P84                                                                                                 | membrane bound        | electron transport chain         | GPC    | held by lipid chains only                                                                                                                       |
| cytochrome C oxidase ( <i>Paracoccus denitrificans</i> ) | 1QLE                                                                                                 | membrane bound        | electron transport chain         | GPC    | held by lipid chains and polar contact to phosphate                                                                                             |
| cytochrome B6F ( <i>Nostoc</i> sp. PCC7120)              | 2ZT9                                                                                                 | membrane bound        | electron transport chain         | OPC    | held by lipid chain; phosphate makes polar contacts                                                                                             |
| ATP synthase rotor ring ( <i>Bacillus pseudofirmus</i> ) | 2X2V                                                                                                 | membrane bound        | ATP synthesis                    | DPV    | bound by lipid chain and phosphate polar contacts; Glu coordinates quaternary amine                                                             |
| cytochrome B6F ( <i>Mastigocladus laminosus</i> )        | 2E74, 2E75, 2E76, 1Vf5, 2D2C                                                                         | membrane bound        | electron transport chain         | OPC    | bound by lipid chains only; PC head group is far above the protein surface                                                                      |
| nuclear liver receptor homolog (human)                   | 4DOS                                                                                                 | soluble               | binds phospholipids              | PLC    | lipid chains and phosphate are bound; choline group sticks out above protein surface                                                            |
| Lipovitellin ( <i>Ichtyomyzon unicuspis</i> )            | 1LSH                                                                                                 | interfacial           | lipid and metal storage          | PLC    | bound by lipid chains only; PC head group is far above the protein surface                                                                      |
| bacteriacidal/permeability increasing protein (human)    | 1EWF, 1BO1                                                                                           | interfacial           | Lipopolysaccharide binding       | GPC    | lipid chains and phosphate are bound; choline sticks out above the surface of the protein                                                       |
| non-specific lipid transfer protein (wheat)              | 1BWO, 1MID                                                                                           | membrane bound        | lipid transfer protein           | LPC    | bound by lipid chain; phosphate and glycerol make polar contacts; choline is above the surface of the protein                                   |
| GM2-activating protein (human)                           | 2AG2                                                                                                 | interfacial           | lysosomal lipid transfer protein | LP3    | bound by lipid chains only                                                                                                                      |
| SF-1 (mouse)                                             | 3F7D                                                                                                 | interfacial           | lipid binding nuclear receptor   | P42    | lipid chains and phosphate are bound; choline group sticks out above protein surface                                                            |
| Wnt inhibitory factor 1 (human)                          | 2YGN, 2YGO, 2YGP, 2YGQ                                                                               | soluble               | growth factor inhibitor          | PCF    | single Phe within $\pi$ -cation distance; but mostly held by lipid chains                                                                       |

| Protein                                                                          | PDBID                  | Membrane Interactions | Function                                | Ligand   | Binding Mode                                                                                                  |
|----------------------------------------------------------------------------------|------------------------|-----------------------|-----------------------------------------|----------|---------------------------------------------------------------------------------------------------------------|
| Wnt inhibitory factor 1 (human)                                                  | 2YGN, 2YGO, 2YGP, 2YGQ | soluble               | growth factor inhibitor                 | PCF      | single Phe within $\pi$ -cation distance; but mostly held by lipid chains                                     |
| calmodulin (bovine)                                                              | 3IF7                   | soluble               | Ca <sup>2+</sup> binding protein        | SPU      | lipid chains bound; choline is coordinated by two Glu                                                         |
| Rhodopsin (squid)                                                                | 2Z73                   | membrane bound        | GPCR                                    | GPC      | bound by lipid chain; phosphate and glycerol make polar contacts; choline not ordered                         |
| rhomboid protease GLPG ( <i>E. coli</i> )                                        | 2XTV                   | membrane bound        | protease                                | MC3      | lipid chains bound; polar contact with phosphates; cholines are above the surface of the protein              |
| SNARE ykt6 longin domain (rat)                                                   | 3KYQ                   | interfacial           | membrane fusion protein                 | DPV      | bound by lipid chains, polar contacts, and a single $\pi$ -cation interaction with quaternary amine           |
| <b>pore-forming cytolysin sticholysin II</b> ( <i>Stichodactyla helianthus</i> ) | 1O72                   | interfacial           | pore forming protein                    | PC       | quaternary amine held by $\pi$ -cation box                                                                    |
| <b>leukocidin F</b> ( <i>Staphylococcus aureus</i> )                             | 3LKF                   | interfacial           | self assembling channel forming protein | PC       | quaternary amine held by a $\pi$ -cation; phosphate bound by Arg                                              |
| lens specific aquaporin ( <i>Ovis aries</i> )                                    | 2B6O                   | membrane bound        | water pore forming protein              | MC3      | bound by lipid chain; phosphate makes polar contacts; choline is above the surface of the protein             |
| bacterial dynamin-like protein ( <i>Nostoc punctiforme</i> )                     | 2W6D                   | membrane bound        | membrane fusion protein                 | CPL      | held by phosphates or lipid chains, not choline                                                               |
| GM2 activator protein (human)                                                    | 1TJJ                   | soluble               | lipid transfer protein                  | PFS      | lipid chains are bound; polar contacts are formed with the phosphates                                         |
| phosphoethanolamine methyltransferase ( <i>Plasmodium falciparum</i> )           | 3UJ9, 3UJC, 3UJD       | soluble               | methyl transferase                      | PC       | mostly coordinated by the phosphate; one $\pi$ -cation interaction with quaternary amine                      |
| CD1D antigen (mouse)                                                             | 2FIK, 2GAZ, 2H26, 1ZHN | soluble               | lipid binding antigen protein           | 6PL, PC6 | acyl chains only; PC head group is far above the protein surface                                              |
| MD-1 lymphocyte antigen (mouse)                                                  | 3M7O                   | soluble               | antigen                                 | L9R      | ligand bound via lipid chains and polar contacts with phosphate; one $\pi$ -cation interaction with the amine |
| CD1b3 (bovine)                                                                   | 3L9R                   | soluble               | antigen?                                | L9R      | bound via acyl chains; phosphocholine is above the surface of the protein                                     |

| Protein                                                       | PDBID                                                    | Membrane Interactions | Function                           | Ligand | Binding Mode                                                                          |
|---------------------------------------------------------------|----------------------------------------------------------|-----------------------|------------------------------------|--------|---------------------------------------------------------------------------------------|
| L-ficolin (human)                                             | 2J0H                                                     | soluble               | lectin-like immune defense protein | ACH    | anchored via acetyl group                                                             |
| BmrR ( <i>B. subtilis</i> )                                   | 3Q5S                                                     | soluble               | multidrug resistance gene          | ACH    | anchored via acetyl group                                                             |
| PaCTD ( <i>Pseudomonas arvilla</i> )                          | 2AZQ, 1DMH, 1DLT, 1DLM, 1DLQ                             | interfacial           | 1,2 dioxygenase                    | PCF    | bound via lipid chains and glycerol group; phosphocholine sticks up above the protein |
| hydroxyquinol 1,2 dioxygenase ( <i>Nocardioides simplex</i> ) | 1TMX, 3N9T, 1S9A                                         | soluble               | dioxygenase                        | HGX    | bound via acyl chains; phosphocholine is not ordered                                  |
| Rho 1,2-CTD ( <i>Rhodococcus opacus</i> )                     | 3HHY,3HJS, 3I51, 3HKP, 3I4Y, 3HGI, 3HHX,3HJQ, 3I4V, 3HJ8 | soluble               | dioxygenase                        | 6PL    | bound by lipid chain and polar contacts to the glycerol                               |

Ligand abbreviations in Table SI.

| Abbreviation | compound                                                                                                          |
|--------------|-------------------------------------------------------------------------------------------------------------------|
| 3PC          | (3S)-3,4-di-N-hexanoyloxybutyl-1-phosphocholine                                                                   |
| 6PL          | 1-palmitoyl-2-stearoyl-sn-glycero-3-phosphocholine                                                                |
| ACH          | acetylcholine                                                                                                     |
| BCH          | butyrylthiocholine                                                                                                |
| CCE          | carbamylcholine                                                                                                   |
| CHO          | choline                                                                                                           |
| CPL          | 1-palmitoyl-2-linoleoyl-phosphatidylcholine                                                                       |
| DLP          | 1,2-dilinoleoyl-sn-glycero-3-phosphocholine                                                                       |
| DPV          | n-dodecylphosphocholine                                                                                           |
| GPC          | glycerophosphocholine                                                                                             |
| HGX          | 1-heptadecanoyl-2-tridecanoyl-3-glycerolphosphonylcholine                                                         |
| L9R          | 1-stearoyl-2-oleoyl-sn-glycero-3-phosphocholine                                                                   |
| LP3          | (7R)-4,7-dihydroxy-N,N,N-trimethyl-10-oxo-3,5,9-trioxa-4-phosphaheptacosan-1-aminium 4-oxide                      |
| LPC          | (1-myristoyl-glycerol-3-yl)phosphonylcholine                                                                      |
| LPE          | 1-O-octadecyl-sn-glycerol-3-phosphocholine                                                                        |
| MC3          | 1,2-dimyristoyl-rac-glycerol-3-phosphocholine                                                                     |
| NCH          | p-nitrophenylphosphocholine                                                                                       |
| OPC          | dioleoylphosphatidylcholine                                                                                       |
| P42          | 1-stearoyl-2-palmitoyl-sn-glycero-3-phosphocholine                                                                |
| PC           | phosphocholine                                                                                                    |
| PC5          | 1,2-di-N-pentanoyl-sn-glycero-3-dithiophosphocholine                                                              |
| PC6          | 7-[(dodecanoyloxy)methyl]-4-hydroxyl-N,N,N-trimethyl-9-oxo-3,5,8-trioxa- 4-phosphado-triacontan-1-aminium 4-oxide |
| PCF          | 1,2-dipalmitoylphosphatidylcholine                                                                                |
| PCK          | 1,2-distearoyl(9,10-dibromo)-sn-glycero-3-phosphocholine                                                          |
| PCW          | 1,2-dioleoyl-sn-glycero-3-phosphocholine                                                                          |
| PFS          | 1-O-octadecyl-2-acetyl-sn-glycerol-3-phosphocholine                                                               |
| PLC          | diundecylphosphatidylcholine                                                                                      |
| PSC          | 1-palmitoyl-2-linoleoyl-sn-glycerol-3-phosphocholine                                                              |
| PX4          | 1,2-dimyristoyl-sn-glycero-3-phosphocholine                                                                       |
| SCK          | succinyl dicholine                                                                                                |
| SCU          | succinylcholine                                                                                                   |

Table S1 shows one overwhelming theme: if a protein specifically binds choline, either as the substrate or product of a reaction, or as a moiety to be transferred, it does so via a protein  $\pi$ -choline cation box. Proteins that bind lipids and are non-specific as to the head group, or proteins which are integral membrane proteins, bind ligand mostly via the lipid chains, or possibly via interactions with the phosphate. Out of 12 proteins that have choline as a ligand, all 12 bound choline via a  $\pi$ -cation box. Similarly, of the 10 proteins that contain phosphocholine, 9 bound the quaternary amine in a  $\pi$ -cation box, while one did not. Conversely, of the 41 proteins that bound phospholipids with a choline head group, only a few had  $\pi$ -cation interactions, and of these there was usually only a single defined interaction of the cation with an aromatic group. Overall, of the 67 different proteins that bind choline or choline containing ligands, 43% of them bind the choline via a  $\pi$ -cation interaction.

### HEPES binding to N254Y/H258Y

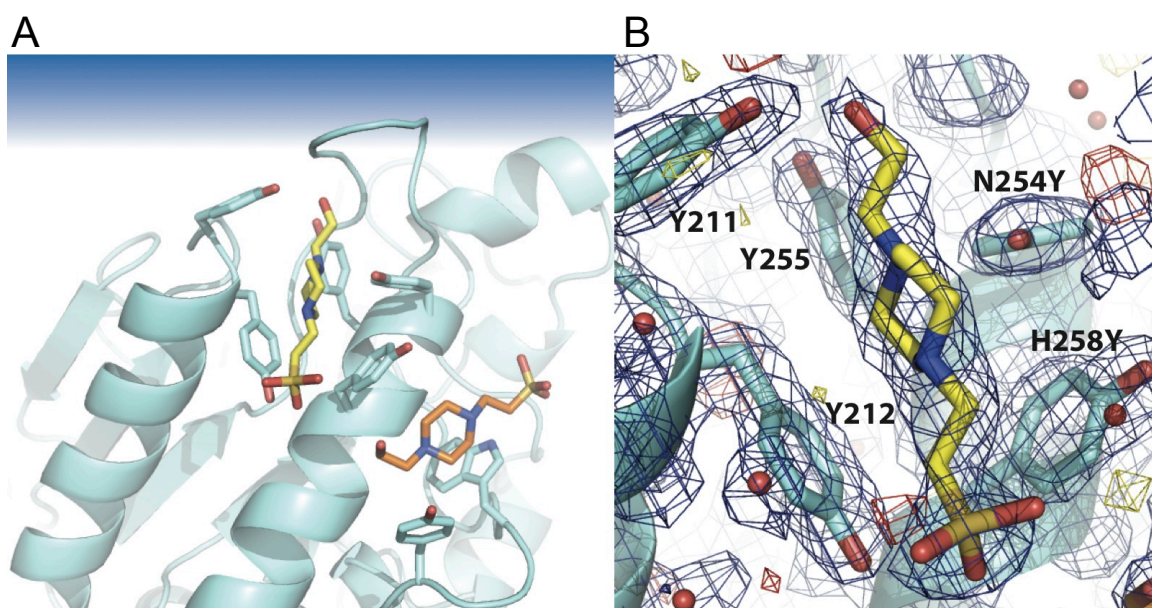

Figure S1. (A) N254Y/H254Y structure with HEPES in the choline binding site (PDB 4F2Y). Representative electron density for HEPES ligands (B). Electron density shown in dark blue and contoured at 1 $\sigma$ , is shown with the model superimposed.

Initially, we generated crystals of N254Y/H258Y from a solution containing 10% isopropanol, 22% PEG 4000, and 100 mM HEPES, pH 7.5. Prior to crystallization, the protein was incubated with 30 mM glycerophosphocholine and 1 mM diC<sub>7</sub>PC for 2 h, though neither of these molecules was evident in the structure. Instead two molecules of HEPES were observed in the helix F/G region (Figure S2). In contrast, when wild type *S. aureus* PI-PLC was crystallized under similar conditions, no small molecules were bound in this region. In this N254Y/H258Y structure (PDB entry 4I9M) one HEPES molecule lies in choline binding site 1, directly between helices F and G, with a cationic nitrogen held between the  $\pi$  systems of Tyr212 and Tyr258. Likewise the cationic nitrogen of the second molecule of HEPES is held in choline binding site 2, between the  $\pi$  systems of Trp287, Tyr290 and Tyr258. Tyr254 provides edge face interactions with Tyr258. In order to accommodate the HEPES molecule in the binding pockets, the side chain of Tyr212 must rotate downward from its position in the unliganded double mutant structure by 94°, while the side chain of Tyr258 must rotate upward 99°. The rotation of Tyr212 forms the left sidewall of binding site one, while Tyr258 forms the right side of this binding site, as well as the left side of binding site two.

Previously, we obtained a structure of H258Y crystallized in acidic conditions (Goldstein et al (2012) *Biochemistry* 51: 2579-2587), but more recently obtained crystals of this mutant protein from a solution containing 10% isopropanol, 22% PEG 4000, and 100 mM HEPES, pH 7.5. The basic H258Y structure (PDB entry 4I9T) has no clear indication of HEPES occupying the sites seen in N254Y/H258Y, although there was some electron density consistent with a low occupancy (<30%) ligand bound in site 2. However, the refinement is best with a small PEG molecule at that site. The reason for the decreased affinity for HEPES in the H258Y single mutant becomes clear when examining the side chains of the binding pockets. Without the mutation N254Y, the edge face interaction between Tyr254 and Tyr258 is lost, this allows the side chain of Tyr258 to exist in either the two distinct positions – one without a ligand (57%) or one where a ligand is present (43%). More importantly, without the mutation of Asn254 to the significantly larger Tyr residue, the side chain of Tyr212 is not completely rotated down into the mutant conformation, and instead appears primarily in the conformation of the WT structure (70%) rather than that of the HEPES bound mutant structure (30%). This implies that both N254Y and H258Y are needed for discrete PC binding to the *S. aureus* PI-PLC.

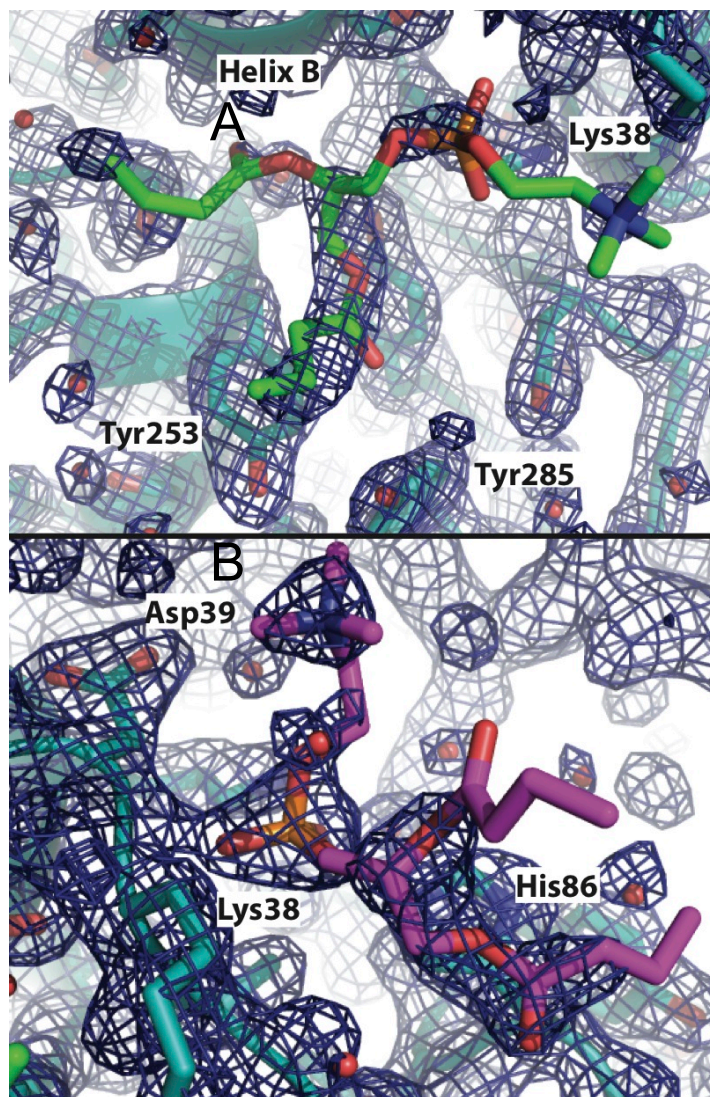

Figure S2. View of the two auxiliary diC<sub>4</sub>PC molecules found in the N254Y/H258Y crystal.

- (A) One phospholipid, under helix B, is bound most likely by hydrophobic interactions of one acyl chain with Tyr253 and Tyr285, although the overall the density is mediocre.
- (B) The secondary auxiliary phospholipid is bound in the anion binding site described in the WT protein (Cheng et al. (2012) *J. Biol. Chem.* 287, 40317-40327). The phosphate is coordinated by Lys38 and His86; densities for the phosphate, quaternary amine, and glycerol backbone are excellent, while the lipid chains are more mobile. Electron density, shown in dark blue in both, is for 2Fo-Fc at 1  $\sigma$ .



**Table S2.** Crystallographic data for selected *S. aureus* PI-PLC crystals.

| Crystal                                | N254Y/H258Y<br>+ HEPES                        | H258Y:<br>Basic                               |
|----------------------------------------|-----------------------------------------------|-----------------------------------------------|
| PDB ID                                 | 4I9M                                          | 4I9T                                          |
| Resolution Range (Å)                   | 2.19-30.85                                    | 1.99-37.63                                    |
| No. of reflections                     | 15898                                         | 20933                                         |
| Reflections in free set                | 795                                           | 1072                                          |
| Space group                            | P2 <sub>1</sub> 2 <sub>1</sub> 2 <sub>1</sub> | P2 <sub>1</sub> 2 <sub>1</sub> 2 <sub>1</sub> |
| Unit cell                              |                                               |                                               |
| a (Å)                                  | 86.22                                         | 85.59                                         |
| b (Å)                                  | 56.12                                         | 57.83                                         |
| c (Å)                                  | 61.71                                         | 60.78                                         |
| Completeness                           | 99.5%                                         | 99.3%                                         |
| R <sub>merge</sub>                     | 11.7                                          | 7.6                                           |
| Protein molecules in A.U.              | 1                                             | 1                                             |
| R <sub>cryst</sub> <sup>a</sup>        | 0.1580                                        | 0.1786                                        |
| R <sub>free</sub> <sup>b</sup>         | 0.2358                                        | 0.2324                                        |
| No. residues                           | 304                                           | 305                                           |
| No. non-hydrogen protein atoms         | 2437                                          | 2498                                          |
| No. H <sub>2</sub> O molecules         | 342                                           | 195                                           |
| No. SO <sub>4</sub> <sup>-2</sup> ions | 1                                             | 1                                             |
| r.m.s.d. bonds (Å)                     | 0.02                                          | 0.20                                          |
| r.m.s.d. angles (°)                    | 1.70                                          | 1.98                                          |
| Ramachandran plot (%)                  |                                               |                                               |
| Most favored                           | 90.1                                          | 96.49                                         |
| Additionally allowed                   | 9.9                                           | 3.19                                          |
| Generously allowed                     | 0                                             | 0.32                                          |
| Disallowed                             | 0                                             | 0                                             |
| Average B-factor (Å <sup>2</sup> )     | 33.45                                         | 25.64                                         |

<sup>a</sup>  $R_{\text{cryst}} = \{\sum (||F_o| - |F_c||) / |F_o|\}$ , where  $|F_o|$  and  $|F_c|$  are the observed and calculated structure factor amplitudes, respectively.

<sup>b</sup> Brunger (1992).
